# Supplementary material
Source: PubMed Central journal article supplement (PMC3711320)
Supplement: supp_M113.482992_jbc.M113.482992-1.pdf [file supp_M113.482992_jbc.M113.482992-1.pdf]

**Table S1.** Sequence identity and similarity (%) between PfPAT and its *Plasmodium* orthologs

|                      | <i>P. falciparum</i> | <i>P. vivax</i> | <i>P. knowlesi</i> | <i>P. yoelii</i> | <i>P. berghei</i> | <i>P. chabaudi</i> |
|----------------------|----------------------|-----------------|--------------------|------------------|-------------------|--------------------|
| <i>P. falciparum</i> | 100 / 100            | 80.9 / 88.9     | 79.7 / 88.4        | 76.6 / 85.7      | 75.9 / 85.6       | 76.0 / 85.0        |
| <i>P. vivax</i>      | -                    | 100 / 100       | 96.1 / 98.0        | 81.2 / 90.2      | 81.0 / 90.8       | 80.5 / 89.1        |
| <i>P. knowlesi</i>   | -                    | -               | 100 / 100          | 81.6 / 90.4      | 81.2 / 91.0       | 80.5 / 89.3        |
| <i>P. yoelii</i>     | -                    | -               | -                  | 100 / 100        | 97.2 / 98.9       | 94.3 / 97.6        |
| <i>P. berghei</i>    | -                    | -               | -                  | -                | 100 / 100         | 94.8 / 97.4        |
| <i>P. chabaudi</i>   | -                    | -               | -                  | -                | -                 | 100 / 100          |

**Table S2.** Percentage of identity and similarity of PAT apicomplexan orthologs

|                                 | <b>% identity</b> | <b>% similarity</b> | <b>% gaps</b> |
|---------------------------------|-------------------|---------------------|---------------|
| <i>T. gondii</i> XP_002370990   | 42.9              | 61.5                | 15.9          |
| <i>T. gondii</i> TGME49_036960A | 29.2              | 45.5                | 20.6          |
| <i>C. parvum</i> XP_626864      | 36.7              | 57.0                | 13.3          |
| <i>C. hominis</i> XP_665995     | 36.2              | 55.6                | 15.0          |
| <i>C. muris</i> XP_002141508    | 23.6              | 39.0                | 39.2          |

*T. gondii*: *Toxoplasma gondii*; *C. parvum*: *Cryptosporidium parvum*; *C. hominis*: *Cryptosporidium hominis*; *C. muris*: *Cryptosporidium muris*;

```

PfpAT      MAKNQYMEDRNIREPNTLLGEETEQLVDSFHYENSSSIYKKNVNSNRKNGKHSMAFHKSLAVNVVAAGLDGCDDQLLPASFRLEADLN 90
Fen2      -----MMKESKSIHQHEVERESVSSKRAIKKRLLEFKID-----LFVLSFVCLQYWINYVDRVG-----FTNAYISGMKEDLK 74
Liz1      -----MALLNRLAKTFSPYYGLNKVEQKLLIKID-----WFILSYCCVSYFINYLDRSS-----INNAVLSGMOEDLK 68
          :: . . :
          . : * : . : : * :
          . : : * : . : : * :

PfpAT      LHPSLIGYITLAOTLMLSESPITWFLSDKYSRKWMLVEGTALHGVATILLANINDFAHILFPRAINGLALGSIGPISOSLLADAAKNES 180
Fen2      MVGNDLTVSNTVFMIGYIVGMVFNMLMLCVPVRIWLSFCFFAWGLLTLGMYKVTSPKHICAIRFFQALFESCTFSGTHFVLGWSYKEDL 158
Liz1      MHGNELQDINVVFTCGYIIGQLPGSYALQRVVPARLWFSVMNLLWGLMTIFSPAVHSVRALMILRFFMAVAEASTFAGTHYILGAWYKESE 153
          : . * . . :
          . : . : . : * : * : . . : : * : . . : : * : * : . .

PfpAT      LGLSFGLVQLSSSLGRLIGGVVTTTVALKYFC--GIRGWRLCFIVVGLSVLLSIIIVALEVEDAPRQVRKKNKKMDYLDGESNTNASNNNN 268
Fen2      LPIRSAIFTGSLVGSMPGFMQTSIFTHLNGRNLGAWRWLFIIDFCITLPIAIYGFIFFPGLPDQTSAVSKFSMTR----- 248
Liz1      LCKRAGIFASGLVGTMFAGYLQTAHVHSSNLNGKGLSGWRWLFIDGILTIPLSLYGLFLFPDVPETTKAP----- 243
          * . . * . * : * : * : * : * : * : * : * : * : * : * : * : * : * : * : * : * : * : * : * : * : * :

PfpAT      NSNNNNNNNNINMNSLDNNSFTGLSHOSTRTYIILYQIVVELLKDSLSKKSIIIIILEGFTGTIPWLLSENTMFFQYCGLS-DLQAA 357
Fen2      -----YIFNEQELHYARRRLPARDESTRLDWSTI PRVLKRWHWMMFSLVWVGGEN-----LGFASNSTFALWLQNKYTLAQ 309
Liz1      -----YFTEQEKELSFKRLPARPKKPLTLKAIKIDIVRSWRIYGLCILWIFSGET-----QAIAVNVLMGQWMMKWSNKFSVAQ 297
          . . : . : * . : . : * : * : * : * : * : * : * : * : * : * : * : * : * : * : * : * : * : * : * :

PfpAT      ITGFLIGSATGGVVGGHFGDIMHDISNKHGRPLLGOLAMFGRVPLVLLIYLVIPKRKESFELFALSCFCIGLSSITAGAVNREIVSDII 447
Fen2      RNNYPGIFAVGIIVSTLCSAVYMSKIPRARHWHVSVFISLVMVIVAVLIRADPLNPKVVFSAQYLG-----VAYAGQAVFFSWANIIC 399
Liz1      INNYPTVITAVGVVSTLGASVISDKLAGNRPWPFGLFLCVITTVSATILLAWNVPDGAFFAYFASG-----CTYAGQAVVFWANDIC 387
          . . : * : * . . : . . : . . : . . : . . : . . : . . : . . : . . : . . : . . : . . : . . : . . : . . :

PfpAT      RPDYRGTVFSLTIAIEGVGSSLIGAPLFGYLAEKIFKYQNNNLLISDMPEDIRINNAQALSKTLYLTIIPWILSFIYSLHETYG--- 534
Fen2      HADLQERAIVLASMMNMFSGAVNAWWSILFFASDMVPKFERGCYALLATAISSGIVSVVIRSLQIKENLSKKQVP-YIDANDMPGEDD--- 479
Liz1      RDNDQERGvvvFLMNMqNIWHIWWAPIMYPNTDTPRFIKGLIGLVVGGIVFVSSCIVSYMQIRDKRIKRSIQDAKDFDDVPTHEHESLE 471
          : : : . : . : . : : : : : : : : : : : : : : : : : : : : : : : : : : : : : : : : : : :

PfpAT      -----KEYLKMNEIIQNEY---KYDDEDEETIPEKKMLT- 565
Fen2      -----DDDNQDNENDGDDES---MEVELHNEEMAEISNPPFR 512
Liz1      LKKIGKNDEESLNTTNAVKEISSPGLVITRQIRISMPKETAQD 514
          . : . : . : . : . : . : . : . : . : . : . : . : . : . : . : . : . : . : . : . : . : . : . : . :

```

**Fig. S1. Alignment of PfpAT with Fen2 and Liz1.** The alignment was performed using ClustalW. The predicted transmembrane segments of PfpAT are underlined and were determined using the TMHMM Server v. 2.0.

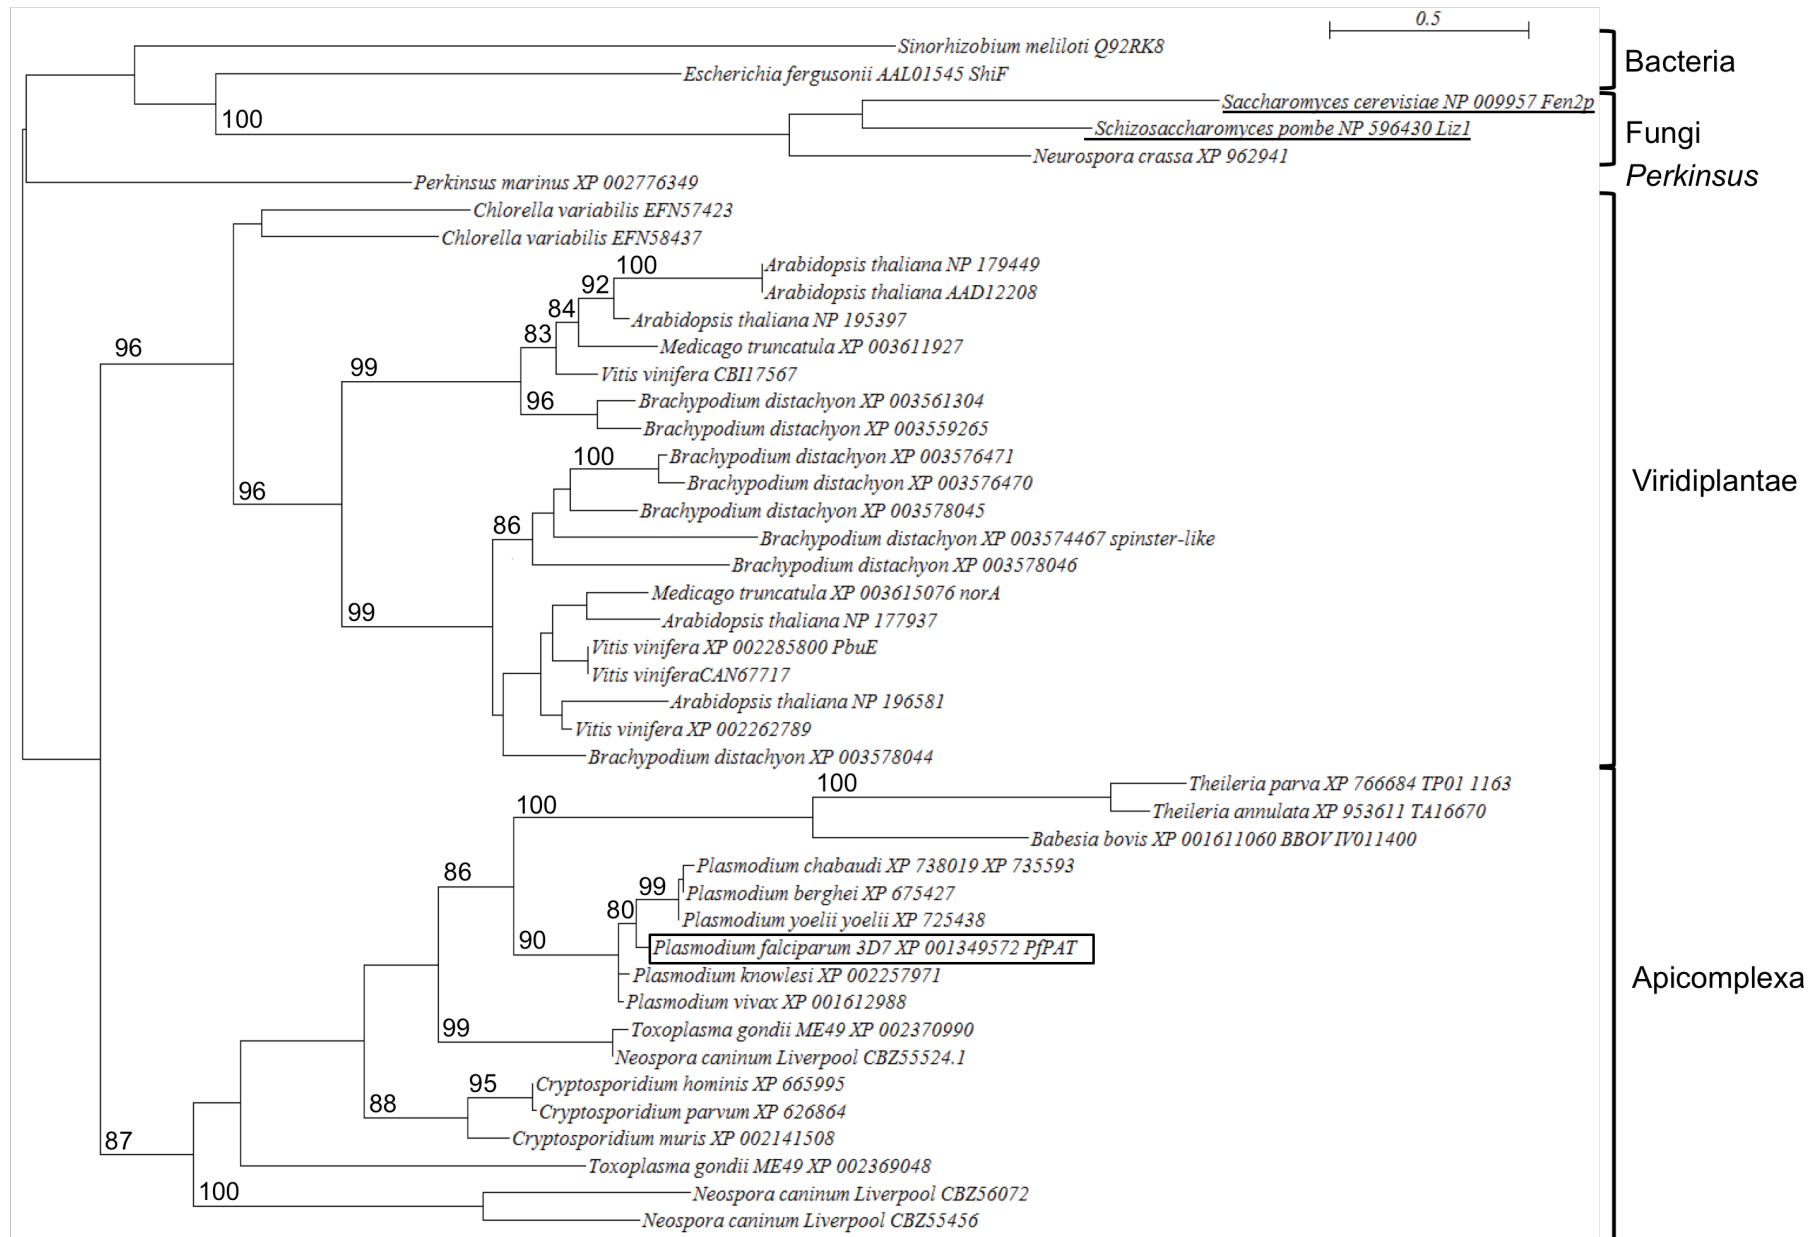

**Fig. S2. Phylogenetic analysis of known panthotenate transporters and their closest homologues.** Significant bootstrap value are given on top of the branch (>80%). The resulting tree has been inferred by maximum likelihood, using Phylogeny.fr “one click” option web interface without Gblock analysis (Dereeper et al. 2008).

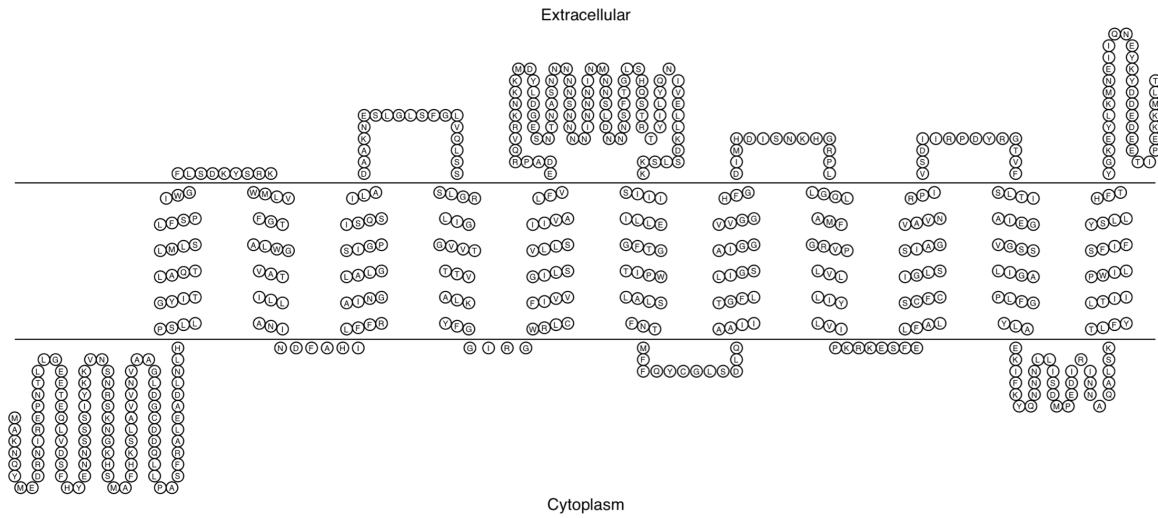

**Fig. S3.** Topology of PfPMT. Transmembrane segment were predicted using the TNHMM program and the topology designed using the TOPO2 program

```

hSMVT      MSVGVSTSAPLSPTSSTSGTSMSTFSIMDYVVFVLLLVLSLAIGLYHACRGWGRHTVGELL 60
PfPAT      MAKNQYMEDRNIREPNTLLGEETEQLVDSFHYE-----NNSSSYKKNV-SNRSKNGKHS 54
          *: . . . . . * : * * . : * . : . : * : . * . * :

hSMVT      MADRKMGCPLVALSLLATFQSAVAILGVPSEIYRFGTQYWFLGCCYFLGLLIPAHIFIPV 120
PfPAT      MAFHKS-----LAVVNVAAGLDGCDDQLLPAS--FRALEADLNLHPSLLGYITLAQ 103
          ** : * . . . . * . : * . : . : * . * : : * : .

hSMVT      FYRLHLTS-AYEYLELRFN-KTVRVCCTVTFIFQMVIYMGVVLYAPSLALNAVTFGFDLWL 178
PfPAT      TLMLSLFSPIWGFSLDKYSRKWMLVFGTALWGVATILLANINDFAHILFFRAING----- 158
          * * * : : * . : * * * . : . : : . : * * : * : * .

hSMVT      SVLALGIVCTVYALGGLKAVIWTDFVQTLVMEFLGQLAVIIVGSAKVGGLGRVWAVASQH 238
PfPAT      --LALGSIGPISQSI-----LADAAKNESLGLSFGLVQLSSSLGRLIGGVVTTTVALKYF 211
          **** : . : : : : : : * : * : : . : * : . . . .

hSMVT      GRISGFELDPDFVRHTFWTLAFGGVFMMLSLYGVNQAVQVQRYLSSRTEKAAVLSCYAVF 298
PfPAT      GGIRGWRLC---FIVVGILSVLLSIIIVALFVEDAPRQVRKKNKMDYLDGESNTNASNNNN 268
          * * * : * * * : : : . : . : . * : : : . : : . : .

hSMVT      PFQQVSLCVGCLIGLVMFAYYQEYPMISIQQAQAPDQFVLYFVMDLLKGLPGLPGLFIAC 358
PfPAT      NSNNNNINN---NINMNNSLDNNSFTGLSHQSTRTYILYQNIVELLKDSLSKKSIIII 324
          : : . : . * : : : : : : * : * : : * . : *

hSMVT      LFGSLSTISSAFNSLATVTMEDLIRPWFPEFSEARAIMLSRGLAFGYLLCLGMAYISS 418
PfPAT      LLEGFTGTIPWLALSFNMTMFFQ-----YCGLSDLQAAIIT-----GFLIGSAIGGV 371
          * : * * * . * : * * : : : : * : * : * : : * * * .

hSMVT      QMGFVLQAAISIFGMVGGPLLGLFCLGMFFPCANPPGAVVGLLAGLVMAFWIGIGSIVTS 478
PfPAT      VGGHFGDIMHDISNKHGRPLLGLQAMFGRVPLVLLIYLVIPKRKESFELFALSFCFCIGLS 431
          * . : . * . * * * * : : . * . * : . * : . * *

hSMVT      MGSSMPSPSNGSSFSLPTNLTVAIVTTLMPLTTFSKPTGLQRFYSLSYLWYSAHNSTTV 538
PfPAT      SIAGVAVNRPIVSDIIRPDYRGTVFSLTIAIEGVGSSSLIGAPLFGYLAEKIFKYQNNN-- 489
          : : : . . * : * . . * : . * . * * * : : : * .

hSMVT      IVVGLIVSLLTGRMRGRSLNPATIYPVLPKLLSLLPLSCQKRLHCRSYGQDHLDTGLFPE 598
PfPAT      ----LLISDMPEDIRINNAQALSKTLYLTIIPWILSFIFYSLLHFTYGKEYLK---MNE 542
          * : * : . * . : . : . : : . : : * : * : * : * . : *

hSMVT      KPRNGVLGDSRDKEAMALDGTAYQGSSTCILQETSL 635
PfPAT      IIQNEYKYDDEDEETIPEKKMLT----- 565
          : * * . . * : * : . .

```

Fig. S4. Alignment of PfPAT with the human multivitamin transporter hSMVT. The alignment was performed using ClustalW.
